1  
2  
3  
4  
5  
6  
7  
8  
9  
10  
11  
12  
13  
14  
15  
16  
17  
18  
19  
20  
21  
22  
23

## Crystal structure of an RNA/DNA strand exchange junction

Joshua C. Cofsky<sup>1</sup>, Gavin J. Knott<sup>2</sup>, Christine L. Gee<sup>1,3,4</sup>, and Jennifer A. Doudna<sup>\*1,3-8</sup>

<sup>1</sup>Department of Molecular and Cell Biology, University of California, Berkeley, Berkeley, California, USA.

<sup>2</sup>Monash Biomedicine Discovery Institute, Department of Biochemistry & Molecular Biology, Monash University, VIC 3800, Australia.

<sup>3</sup>California Institute for Quantitative Biosciences (QB3), University of California, Berkeley, Berkeley, California, USA.

<sup>4</sup>Howard Hughes Medical Institute, University of California, Berkeley, Berkeley, California, USA.

<sup>5</sup>Department of Chemistry, University of California, Berkeley, Berkeley, California, USA.

<sup>6</sup>Molecular Biophysics and Integrated Bioimaging Division, Lawrence Berkeley National Laboratory, Berkeley, Berkeley, California, USA.

<sup>7</sup>Innovative Genomics Institute, University of California, Berkeley, Berkeley, California, USA.

<sup>8</sup>Gladstone Institutes, University of California, San Francisco, San Francisco, California, USA.

\*Corresponding author

E-mail: [doudna@berkeley.edu](mailto:doudna@berkeley.edu) (J.A.D.)

## 24 **Abstract**

25 Short segments of RNA displace one strand of a DNA duplex during diverse processes  
26 including transcription and CRISPR-mediated immunity and genome editing. These  
27 strand exchange events involve the intersection of two geometrically distinct helix  
28 types—an RNA:DNA hybrid (A-form) and a DNA:DNA homoduplex (B-form). Although  
29 previous evidence suggests that these two helices can stack on each other, it is  
30 unknown what local geometric adjustments could enable A-on-B stacking. Here we  
31 report the X-ray crystal structure of an RNA-5'/DNA-3' strand exchange junction at an  
32 anisotropic resolution of 1.6 to 2.2 Å. The structure reveals that the A-to-B helical  
33 transition involves a combination of helical axis misalignment, helical axis tilting and  
34 compression of the DNA strand within the RNA:DNA helix, where nucleotides exhibit a  
35 mixture of A- and B-form geometry. These structural principles explain previous  
36 observations of conformational stability in RNA/DNA exchange junctions, enabling a  
37 nucleic acid architecture that is repeatedly populated during biological strand exchange  
38 events.

39

## 40 Introduction

41 Although structural and mechanistic information is available for various types of DNA  
42 strand exchange processes [1–8], comparatively little is known about RNA/DNA strand  
43 exchange. In this reversible process, a strand of RNA hybridizes to one strand of a DNA  
44 duplex while displacing the other strand, requiring concomitant disruption of DNA:DNA  
45 base pairs and formation of RNA:DNA base pairs. This process occurs most notably at  
46 the boundaries of R-loops, such as those left by transcriptional machinery [9], those  
47 employed by certain transposons [10,11], or those created by CRISPR-Cas (clustered  
48 regularly interspaced short palindromic repeats, CRISPR-associated) enzymes during  
49 prokaryotic immunity or eukaryotic genome editing [12–15]. Structural insight into  
50 RNA/DNA strand exchange could therefore improve our understanding of how  
51 transcriptional R-loops are resolved and how CRISPR-Cas enzymes such as Cas9  
52 manipulate R-loops to efficiently reject off-target DNA and recognize on-target DNA.

53 The defining feature of RNA/DNA strand exchange is the junction where the  
54 RNA:DNA helix abuts the DNA:DNA helix. Previous experiments on exchange junctions  
55 containing an RNA-5' end and a DNA-3' end (an “RNA-5'/DNA-3' junction,” which is the  
56 polarity generated by Cas9) showed the component DNA:DNA duplex to be more  
57 thermodynamically stable than a free DNA helix end, perhaps due to interhelical  
58 RNA:DNA/DNA:DNA stacking [16]. While stacking in DNA-only junctions is thought to  
59 occur as it would in an uninterrupted B-form duplex [8,17,18], an analogous structural  
60 prediction cannot be made for RNA/DNA junctions because the two component helices  
61 are predisposed to different geometries: B-form for the DNA:DNA helix and a variant of  
62 A-form for the RNA:DNA helix [19–21]. A conformation that preserves base stacking

63 across such a junction must reconcile base pairs that are flat and centered (B-form) with  
64 base pairs that are inclined and displaced from the helical axis (A-form). While prior  
65 structural studies of Okazaki fragments reckoned with a similar geometric puzzle [22],  
66 Okazaki fragments bear an RNA-3'/DNA-5' polarity (opposite of the polarity addressed  
67 here) and lack the strand discontinuity that defines exchange junctions. Thus, the  
68 structural basis for the putative stacking-based stability in RNA-5'/DNA-3' junctions  
69 remains unknown.

70 Here we present the X-ray crystal structure of an RNA-5'/DNA-3' strand  
71 exchange junction, which undergoes an A-to-B transition without loss of base pairing or  
72 stacking across the exchange point. This structure reveals the principles of global  
73 helical positioning and local adjustments in nucleotide conformation that allow  
74 RNA:DNA duplexes to stack on DNA:DNA duplexes in the RNA-5'/DNA-3' polarity. This  
75 model also complements previously determined cryo-electron microscopy structures of  
76 DNA-bound Cas9 for which poor local resolution in the original maps prevented  
77 accurate modeling of the leading R-loop edge.

78

## 79 **Results**

80 Inspired by previous crystallographic studies of double-stranded DNA dodecamers  
81 [23,24], we designed crystallization constructs that contained a “template” DNA strand  
82 (12 nucleotides) and two “exchanging” RNA and DNA oligonucleotides that were  
83 complementary to each half of the template DNA strand. In different versions of these  
84 constructs, we varied the polarity (RNA-5'/DNA-3' vs. RNA-3'/DNA-5') and the internal  
85 termini, which were either flush (exchanging oligonucleotides were 6-mers) or extended

86 with a one-nucleotide flap that was not complementary to the template strand  
87 (exchanging oligonucleotides were 7-mers, “flapped”). Only the flapped construct in the  
88 RNA-5'/DNA-3' polarity (Fig 1A) yielded well-diffracting crystals (anisotropic resolution of  
89 1.6 to 2.2 Å). Thus, all results discussed here describe a flapped RNA-5'/DNA-3' strand  
90 exchange junction, which is the polarity previously observed to stabilize the component  
91 DNA:DNA duplex [16].

92

93 **Fig 1. Stabilizing features of the crystal lattice.**

94 (A) Crystallization construct sequence. Black, DNA; red, RNA. (B) Schematized drawing  
95 (not to scale) of the crystal lattice along a direction that depicts the helical network  
96 formed by Molecules 1 and 2. Green shading, Molecule 1; blue shading, Molecule 2;  
97 orange shading, Molecule 3 (cross section). (C) Similar to panel B, but along a direction  
98 that depicts the helical network formed by Molecule 3. (D) Asymmetric unit colored by  
99 atomic B-factor. The thickness of the cartoon model also reflects the local B-factors. (E)  
100 Model and  $2mF_o - DF_c$  map (sharpened by  $-38 \text{ \AA}^2$ , displayed at  $3.3\sigma$ ) of the Ade-Ade and  
101 Cyt-Cyt base pairs (contributed by the flap nucleotides of Molecules 1 and 2) that bridge  
102 the helical network formed by Molecule 3. Distortion in the map is due to diffraction  
103 anisotropy (see Methods).

104

105 We determined the X-ray crystal structure of the exchange junction (Table 1). In  
106 this structure, the asymmetric unit contains three molecules (a “molecule” comprises  
107 one DNA 12-mer and its complementary RNA and DNA 7-mers). The crystal lattice is  
108 largely stabilized by nucleobase stacking interactions both within and between

109 molecules. Along one lattice direction, Molecules 1 and 2 form a continuous network of  
 110 stacked helices, in which the external RNA:DNA duplex terminus of each Molecule 1  
 111 stacks on the equivalent terminus of Molecule 2, with a similar reciprocal interaction for  
 112 the external DNA:DNA duplex termini (a “head-to-head” and “foot-to-foot” arrangement)  
 113 (Fig 1B). Along another lattice direction, symmetry-related instances of Molecule 3  
 114 create a head-to-foot helical network (Fig 1C). Compared to Molecules 1 and 2,  
 115 Molecule 3 is poorly ordered (Fig 1D), and its atomic coordinates appear less  
 116 constrained by the data due to diffraction anisotropy (see Methods). In the Molecule 3  
 117 helical network, two base pairs formed between the flapped nucleotides of Molecules 1  
 118 and 2 bridge the duplex ends. The bridging nucleotides form a type I adenine-adenine  
 119 (ribonucleotide) base pair and a type XV hemiprotonated cytosine-cytosine  
 120 (deoxyribonucleotide) base pair [25] (Fig 1C, E).

121

122 **Table 1. Crystallographic data and refinement statistics**

|                                     | RNA-5'/DNA-3' strand exchange junction (PDB XXXX) |
|-------------------------------------|---------------------------------------------------|
| <b>Data collection</b>              |                                                   |
| Wavelength (Å)                      | 1.116                                             |
| Resolution range (Å)                | 35.335 - 1.637 (1.781-1.637)                      |
| Diffraction limit #1 (Å)            | 1.656                                             |
| Principal axes (orthogonal basis)   | 0.8648, -0.0396, -0.5006                          |
| Principal axes (reciprocal lattice) | 0.657 a* - 0.168 b* - 0.735 c*                    |
| Diffraction limit #2 (Å)            | 2.176                                             |
| Principal axes (orthogonal basis)   | 0.1677, 0.9624, 0.2136                            |
| Principal axes (reciprocal lattice) | 0.152 a* + 0.981 b* + 0.117 c*                    |
| Diffraction limit #3 (Å)            | 1.637                                             |
| Principal axes (orthogonal basis)   | 0.4733, -0.2686, 0.8389                           |
| Principal axes (reciprocal lattice) | 0.397 a* - 0.342 b* + 0.852 c*                    |
| Space group                         | P 1                                               |
| Unit cell                           |                                                   |
| a, b, c (Å)                         | 37.025, 43.586, 52.182                            |

|                                        |                                |
|----------------------------------------|--------------------------------|
| $\alpha, \beta, \gamma$ (°)            | 92.06, 103.72, 99.95           |
| Total reflections                      | 147975 (7830)                  |
| Unique reflections                     | 24808 (1240)                   |
| Multiplicity                           | 6.0 (6.3)                      |
| Spherical completeness (%)             | 64.7 (14.5)                    |
| Ellipsoidal completeness (%)           | 86.8 (50.0)                    |
| $\langle I/\sigma(I) \rangle$          | 15.6 (1.5)                     |
| Wilson B-factor (Å <sup>2</sup> )      |                                |
| Eigenvalue #1 (Å)                      | 48.57                          |
| Principal axes (orthogonal basis)      | 0.9603, -0.1659, -0.2243       |
| Principal axes (reciprocal lattice)    | 0.799 a* - 0.323 b* - 0.507 c* |
| Eigenvalue #2 (Å)                      | 86.73                          |
| Principal axes (orthogonal basis)      | 0.2257, 0.9345, 0.2753         |
| Principal axes (reciprocal lattice)    | 0.209 a* + 0.961 b* + 0.183 c* |
| Eigenvalue #3 (Å)                      | 45.47                          |
| Principal axes (orthogonal basis)      | 0.1639, -0.3150, 0.9348        |
| Principal axes (reciprocal lattice)    | 0.123 a* - 0.300 b* + 0.946 c* |
| R <sub>merge</sub>                     | 0.037 (1.293)                  |
| R <sub>meas</sub>                      | 0.041 (1.410)                  |
| R <sub>pim</sub>                       | 0.016 (0.556)                  |
| CC <sub>1/2</sub>                      | 0.999 (0.474)                  |
| <b>Refinement</b>                      |                                |
| Resolution range (Å)                   | 35.34 - 1.641 (1.768 - 1.641)  |
| Reflections used in refinement         | 24717 (1054)                   |
| Reflections used for R <sub>free</sub> | 1223 (41)                      |
| R <sub>work</sub>                      | 0.2371 (0.3692)                |
| R <sub>free</sub>                      | 0.2846 (0.3561)                |
| CC <sub>work</sub>                     | 0.912 (0.616)                  |
| CC <sub>free</sub>                     | 0.939 (0.562)                  |
| Number of non-hydrogen atoms           | 1651                           |
| macromolecules                         | 1584                           |
| ligands                                | 0                              |
| solvent                                | 67                             |
| Protein residues                       | 0                              |
| RMSD – bond lengths (Å)                | 0.014                          |
| RMSD – angles (°)                      | 1.42                           |
| Clashscore                             | 0.00                           |
| Average B-factor                       | 59.75                          |
| macromolecules                         | 60.15                          |
| solvent                                | 50.35                          |
| Number of TLS groups                   | 15                             |

123 Diffraction limits and eigenvalues of overall anisotropy tensor on  $|F|$ s are displayed  
 124 alongside the corresponding principal axes of the ellipsoid fitted to the diffraction cut-off  
 125 surface as direction cosines in the orthogonal basis (standard PDB convention), and in

126 terms of reciprocal unit-cell vectors. Statistics for the highest-resolution shell are shown  
127 in parentheses.

128  
129       The three molecules of the asymmetric unit exhibit canonical Watson-Crick base  
130 pairing at all twelve nucleotides of the template DNA strand, and they are generally  
131 similar in conformation ( $\text{RMSD}_{\text{Mol1,Mol2}}=0.703 \text{ \AA}$ ;  $\text{RMSD}_{\text{Mol1,Mol3}}=1.528 \text{ \AA}$ ,  
132  $\text{RMSD}_{\text{Mol2,Mol3}}=1.770 \text{ \AA}$ ) (Fig 2A). The most dramatic differences are between Molecules  
133 1/2 and Molecule 3. For example, Molecule 3's flapped nucleotides form no  
134 intermolecular base pairs, and the conformation of the DNA flap is flipped relative to  
135 Molecules 1/2. Additionally, the external three base pairs of Molecule 3's DNA:DNA  
136 helix tilt slightly toward the major groove as compared to the equivalent positions of  
137 Molecules 1/2. Notably, the similarity of all three molecules at the three base pairs on  
138 either side of the exchange point ( $\text{RMSD}_{\text{Mol1,Mol2}}=0.567 \text{ \AA}$ ;  $\text{RMSD}_{\text{Mol1,Mol3}}=0.502 \text{ \AA}$ ,  
139  $\text{RMSD}_{\text{Mol2,Mol3}}=0.751 \text{ \AA}$ ) suggests that the conformation in this region represents a low-  
140 energy solution to the stacking of RNA:DNA and DNA:DNA helices.

141

142 **Fig 2. Molecule-to-molecule similarity and hydrogen bonding at the flapped**  
143 **nucleotides.**

144 (A) All-atom alignment of the three molecules in the asymmetric unit. Green, Molecule  
145 1; blue, Molecule 2; orange, Molecule 3. Molecules 2 and 3 were aligned to Molecule 1  
146 in this depiction. (B) Hydrogen bonding at the flapped nucleotides of Molecule 1. Dotted  
147 lines indicate hydrogen bonds, and adjacent numbers indicate interatomic distance in  $\text{\AA}$ .  
148 Black, DNA; red, RNA. This hydrogen bonding pattern is also observed in Molecule 2  
149 but not in Molecule 3.



150

151           At the exchange point of Molecules 1 and 2, the flapped nucleotides are  
152 stabilized not only by intermolecular base pairing (Fig 1C, E) and intramolecular  
153 stacking (Fig 2B), but also by hydrogen bonds between sugar hydroxyls and backbone  
154 phosphates. Specifically, at the junction-proximal phosphodiester within the DNA:DNA  
155 helix, the *pro-S<sub>p</sub>* and *pro-R<sub>p</sub>* oxygens are hydrogen-bonded to the terminal 3' hydroxyl of  
156 the flapped DNA nucleotide and the terminal 5' hydroxyl of the flapped RNA nucleotide,  
157 respectively. Additionally, the *pro-S<sub>p</sub>* oxygen of the flapped DNA nucleotide is hydrogen-  
158 bonded to the 2' hydroxyl of the flapped RNA nucleotide (Fig 2B). If the flaps were  
159 longer than one nucleotide, as would occur during biological strand exchange events,  
160 the hydrogen bonds to the terminal 3'/5' hydroxyls would be perturbed. However, in  
161 Molecule 3, the flipped deoxycytidine conformation precludes all the mentioned  
162 extrahelical hydrogen bonds, yet the base-paired nucleotides within the junction are  
163 conformationally similar to the same region in Molecules 1 and 2 (Fig 2A). Therefore,  
164 we expect that the structural features of interest to this work—that is, the conformation  
165 of the base-paired nucleotides immediately adjacent to the junction—would be  
166 populated by junctions bearing flush RNA/DNA ends or flaps of arbitrary length.

167           To understand the nature of the transition in helical geometry across the junction,  
168 we performed alignments of regularized A-form and B-form DNA:DNA helices with the  
169 observed RNA:DNA and DNA:DNA helices, respectively. These alignments revealed  
170 that the DNA:DNA helix closely approximates perfect B-form geometry, especially in the  
171 nucleotides closest to the junction (Fig 3A-C). Likewise, the RNA strand of the  
172 RNA:DNA helix closely approximates A-form geometry (Fig 3A-C). On the other hand,

173 the DNA strand of the RNA:DNA helix deviates from its A-form trajectory in the three  
174 nucleotides that approach the exchange point, where the backbone is compressed  
175 toward the minor groove (Fig 3B, D).

176

177 **Fig 3. Alignments to regularized A-form/B-form helices.**

178 (A) Black, DNA of Molecule 1; red, RNA of Molecule 1; white, regularized B-form  
179 DNA:DNA helix aligned to the 6 bp of Molecule 1's DNA:DNA helix; pink, regularized A-  
180 form DNA:DNA helix aligned to the 6 bp of Molecule 1's RNA:DNA helix. (B) Cartoon  
181 depiction, focused on the continuous strand. The alignment procedure for each 6-bp  
182 block was identical to that performed in panel A, but in this depiction, the B-form (white)  
183 and A-form (pink) helices were extended by an additional 6 bp (extended nucleotides  
184 were not considered during alignment) to illustrate the path that the helix would take if  
185 continuing along a perfect B-form or A-form trajectory. EP, exchange point (that is, the  
186 phosphodiester or gap lying between the two nucleotides where the helix changes from  
187 RNA:DNA to DNA:DNA). (C) Similar to panel B, but focused on the discontinuous  
188 strand. (D) Close-up of the same representation depicted in panel A, focused on the  
189 nucleotides that deviate most dramatically from the aligned A-form helix.

190

191 Interestingly, calculation of  $z_P$ , a geometric parameter that differentiates A-form  
192 from B-form base steps [26], indicated that the RNA:DNA base step adjacent to the  
193 exchange point is A-like, while the base steps in the center of the RNA:DNA helix are  
194 intermediate in their A/B character (Fig 4A). This result indicates an important distinction  
195 between strand trajectory (in terms of global alignment to a regularized A-form or B-form

196 helix) and the local nucleotide conformations that underlie the trajectory. In the  
197 RNA:DNA helix, the departure from A-form trajectory observed at junction-adjacent  
198 nucleotides appears to result from non-A conformations at more junction-distal  
199 nucleotides. Other indicators of helical geometry also suggest a mixture of A and B  
200 character across the RNA:DNA helix (S1 Fig).

201

202 **Fig 4. Geometric details of the A-to-B transition.**

203 (A) For a given base step, the parameter  $z_P$  is the mean of the z-displacement of the  
204 two phosphorus atoms from the dimer's reference xy-plane. Note that  $z_P$  is defined by a  
205 pair of dinucleotides, so there are only 11 data points for a 12-bp helix, and integral x-  
206 values lie between the base pairs in the diagram. This parameter was originally  
207 introduced for its utility in distinguishing A-form from B-form base steps. Black, DNA;  
208 red, RNA. (B)  $\chi$  and  $\delta$  are the two nucleotide torsion angles that best distinguish A-form  
209 from B-form geometry. Note that these torsion angles are defined for each individual  
210 nucleotide, so there are 24 data points for a 12-bp helix. Integers in red refer to  
211 individual nucleotides, as indicated in the schematic at the bottom. Dashed ellipses  
212 were drawn to match those depicted in [27]. (C) Y-displacement. Similar to  $z_P$ , this  
213 parameter describes base steps (pairs of dinucleotides), not individual nucleotides. This  
214 parameter cannot distinguish A-form from B-form geometry. Instead, note that the base  
215 step across the exchange point dramatically departs from both A-form and B-form  
216 geometry.

217

218 To probe helical geometry with strand specificity, we calculated  $\chi$  and  $\delta$ ,  
219 nucleotide torsion angles that differ in A-form vs. B-form helices [27]. These parameters  
220 revealed that the irregularities observed in the paired base step parameters (Fig 4A and  
221 S1 Fig) arise entirely from the template DNA strand, which flips between A- and B-like  
222 conformations within the RNA:DNA hybrid (Fig 4B and S2 Fig). In contrast, the RNA  
223 strand is entirely A-like, and all nucleotides of the DNA:DNA helix are B-like except at  
224 position 12 of the continuous strand, which is likely due to an end effect. These  
225 observations agree with the conclusions drawn from the alignments (Fig 3A), and they  
226 highlight the DNA strand of the RNA:DNA helix as the structure's most geometrically  
227 irregular region, which may enable the junction-adjacent deviation in trajectory.

228 In addition to the distortions in the continuous DNA strand, the geometric switch  
229 also seems to depend on the break in the discontinuous strand, which facilitates a  
230 marked jump in the backbone trajectory across the exchange point (Fig 3C). This  
231 feature reflects a global jump in helical positioning that is visualized most clearly in the  
232 aligned regularized A-form and B-form duplexes, whose helical axes are tilted and  
233 misaligned with respect to each other (the helical axes are tilted from parallel by 14°,  
234 Mol1; 18°, Mol2; 2°, Mol3) (Fig 2A and Fig 3B, C). Axis misalignment is detectable in the  
235 large positive y-displacement value across the central base step, which deviates  
236 dramatically from the expected value (0 Å) for either an A-form or B-form duplex (Fig  
237 4C). This observation emphasizes the exchange point as a special base step with  
238 noncanonical alignment, made possible by discontinuity in the exchanging strands.

239

## 240 Discussion

241 Together, our data suggest that stacking an RNA:DNA helix on a DNA:DNA helix does  
242 not require deviation of the RNA strand or either strand of the DNA:DNA helix from their  
243 native A-form or B-form conformations, respectively. Instead, continuous stacking  
244 appears to result from a combination of three structural principles. First, alternating A-  
245 like and B-like nucleotide conformations in the hybrid's DNA strand compress the strand  
246 relative to a pure A-form trajectory (Fig 3B, D, Fig 4B, Fig 5A). Due to A-form base pair  
247 inclination ( $\sim 20^\circ$  from perpendicular to the helical axis) in RNA:DNA duplexes, the DNA  
248 naturally juts further along the helical axis than the RNA at the RNA-5' end. This slanted  
249 RNA:DNA end can be stacked upon a flat DNA:DNA end through strand-specific  
250 compression—that is, compression of the hybrid's protruding DNA strand (Fig 5A).  
251 Second, an alternative to strand compression is to tilt the helical axes themselves,  
252 which occurs in Molecules 1 and 2 but not Molecule 3 (Fig 2A and Fig 5A). Third, the  
253 helical centers are misaligned at the exchange point (Fig 3B, C and Fig 4C), which  
254 effectively aligns the off-center base pairs of the A-form duplex with the centered base  
255 pairs of the B-form duplex (Fig 5B).

256

257 **Fig 5. Structural principles of A-on-B stacking at the RNA-5'/DNA-3' strand**

258 **exchange junction.**

259 (A) Simplified schematics illustrating strand-specific compression and tilting of the  
260 helical axes. The slanted appearance of the RNA:DNA duplex is intended to represent  
261 the base pair inclination characteristic of A-form duplexes, which pushes the 3' DNA end  
262 farther along the helical axis than the 5' RNA end. Black, DNA; red, RNA. (B) Helical  
263 cross-sections. Black, DNA:DNA helix; red, RNA:DNA helix. The rectangle represents

264 the base pair nearest the exchange point (centered in the B-form helix, off-center in the  
265 A-form helix). The solid circle represents the helical axis. The true stacking solution is a  
266 combination of the three principles illustrated here, although Molecule 3 does not exhibit  
267 tilting.

268

269 This new structure is best examined in the context of previous structural studies  
270 of RNA:DNA/DNA:DNA junctions emulating Okazaki fragments, which include a  
271 chimeric (covalently continuous) RNA-DNA strand. When crystallized, these fragments  
272 assumed an entirely A-form conformation, even within the DNA:DNA duplex [28–32].  
273 However, in solution, Okazaki fragments resembled the present structure in that they  
274 were A-like within the RNA:DNA helix and B-like within the DNA:DNA helix [22,33–36].  
275 Solution structures also exhibited a tilt between the RNA:DNA/DNA:DNA helical axes  
276 and intermediate nucleotide geometry within the DNA of the hybrid. Because  
277 intermediate geometry is a known feature of the DNA of any RNA:DNA hybrid [19,20], it  
278 may be the natural inclination of this more geometrically ambiguous strand to  
279 accommodate the A-to-B transition as it does in the present structure. Notably, dramatic  
280 misalignment of the RNA:DNA/DNA:DNA helical centers is observed only in the present  
281 structure and is likely enabled by the break in the exchanging strands, which is not a  
282 feature of Okazaki fragments.

283 Because stable stacking of another duplex on a DNA:DNA terminus is expected  
284 to inhibit duplex melting [37], the structural principles illuminated here may explain the  
285 rigidity that we previously observed in the DNA:DNA duplex of RNA-5'/DNA-3' exchange  
286 junctions [16]. However, it is also possible that different sequences or environments

287 promote different conformational preferences than those observed in this crystal  
288 structure. Previously, we also observed that the DNA:DNA duplex in junctions of the  
289 opposite polarity (RNA-3'/DNA-5') is destabilized relative to a non-exchanging terminus  
290 [16]. Unfortunately, because that junction type failed to crystallize under our tested  
291 conditions, this odd asymmetry in junction structure remains unexplained.

292         Nevertheless, the stacked RNA-5'/DNA-3' structure determined here represents  
293 a key conformation that is likely populated throughout RNA/DNA exchange events,  
294 including those mediated by the genome-editing protein Cas9. Branch migration is  
295 crucial to Cas9 target search, which involves repeated R-loop formation (RNA invades a  
296 DNA:DNA duplex) and resolution (DNA invades an RNA:DNA duplex) until the true  
297 target is located [15]. During this process, the leading R-loop edge likely passes through  
298 interhelically stacked states between base pair formation and breakage events.  
299 Consistent with this prediction, in some cryo-electron microscopy structures depicting  
300 Cas9-bound R-loops, the leading (RNA-5'/DNA-3') R-loop edge appeared interhelically  
301 stacked [38,39]. While local resolution was insufficient to enable accurate atomic  
302 modeling of the exchange junction from the original electron microscopy maps, our  
303 high-resolution crystal structure provides a new geometric standard for modeling this  
304 kind of junction.

305         Importantly, exchange junctions are dynamic structures, and each time an R-loop  
306 grows or shrinks, stacking must be disrupted at the junction [8]. Thus, in addition to the  
307 stacked structure determined here, which can be interpreted as a ground state, strand  
308 exchange also requires passage through unstacked conformations, some of which may  
309 resemble the junction structures seen in other Cas9-bound R-loops [40,41]. A complete

310 model of RNA/DNA strand exchange, then, will rely on a structural and energetic  
311 understanding of the junction in both stacked and unstacked states, and it will account  
312 for the effects of the proteins acting in R-loop formation and resolution.

313



## 314 **Methods**

### 315 **Oligonucleotide synthesis and sample preparation**

316 All oligonucleotides (DNA 12-mer {5'-GTAAGCAGCATC-3'}; DNA 7-mer {5'-GATGCTC-  
317 3'}; RNA 7-mer {5'-AGCUUAC-3'}) were synthesized and purified by Integrated DNA  
318 Technologies (high-performance liquid chromatography (HPLC) purification for DNA  
319 oligonucleotides and RNase-free HPLC purification for the RNA oligonucleotide). Dry  
320 oligonucleotides were dissolved in nuclease-free water (Qiagen), and concentrations  
321 were estimated by Nanodrop (Thermo Scientific) absorbance measurements with  
322 extinction coefficients estimated according to [42] (DNA 12-mer,  $\epsilon_{260}=135200 \text{ M}^{-1}\cdot\text{cm}^{-1}$ ;  
323 DNA 7-mer,  $\epsilon_{260}=70740 \text{ M}^{-1}\cdot\text{cm}^{-1}$ ; RNA 7-mer,  $\epsilon_{260}=75580 \text{ M}^{-1}\cdot\text{cm}^{-1}$ ). The three  
324 oligonucleotides were combined and diluted in water, each at 500  $\mu\text{M}$  final  
325 concentration. This exchange junction sample was incubated at 50°C for 10 minutes,  
326 cooled to 25°C within a few seconds, and used directly in the crystallization setups  
327 described below.

328

### 329 **Crystallization and data collection**

330 Initial screens were performed using Nucleix and Protein Complex suites (Qiagen) in a  
331 sitting-drop setup, with 200 nL of sample added to 200 nL of reservoir solution by a  
332 Mosquito instrument (SPT Labtech) and incubated at either 4°C or 20°C. Several  
333 conditions yielded crystals within one day, and initial hits were further optimized at a  
334 larger scale. The crystal used for the final dataset was produced as follows: 0.5  $\mu\text{L}$  of  
335 sample was combined with 0.5  $\mu\text{L}$  reservoir solution (0.05 M sodium succinate (pH 5.3),

336 0.5 mM spermine, 20 mM magnesium chloride, 2.6 M ammonium sulfate) in a hanging-  
337 drop setup over 500  $\mu$ L reservoir solution, and the tray was stored at 20°C. Crystals  
338 formed within one day and remained stable for the 2.5 weeks between tray setting and  
339 crystal freezing. A crystal was looped, submerged in cryoprotection solution (0.05 M  
340 sodium succinate (pH 5.3), 0.5 mM spermine, 20 mM magnesium chloride, 3 M  
341 ammonium sulfate) for a few seconds, and frozen in liquid nitrogen. Diffraction data  
342 were collected under cryogenic conditions at the Advanced Light Source beamline 8.3.1  
343 on a Pilatus3 S 6M (Dectris) detector.

344

## 345 **Data processing, phase determination, and model refinement**

346 Preliminary processing of diffraction images was performed in XDS [43,44]. Unmerged  
347 reflections underwent anisotropic truncation, merging, and anisotropic correction using  
348 the default parameters of the STARANISO server (v3.339) [45], and a preliminary  
349 structural model was included in the input to estimate the expected intensity profile. The  
350 best-fit cut-off ellipsoid imposed diffraction limits of 1.656 Å, 2.176 Å, and 1.637 Å based  
351 on a cut-off criterion of  $I/\sigma(I)=1.2$ . The “aniso-merged” output MTZ file was used for  
352 downstream processing. Using programs within CCP4 (v7.1.015),  $R_{\text{free}}$  flags were  
353 added to 5% of the reflections, and reflections outside the diffraction cut-off surface  
354 were removed.

355 Phases were determined by molecular replacement with Phaser-MR [46], as  
356 implemented in Phenix v1.19.2-4158 [47]. The search model comprised two  
357 components (unconstrained with respect to each other), both generated in X3DNA v2.4  
358 [48] and each representing one half of the base-paired portion of the crystallization

359 construct. The first component was a 6-base-pair RNA:DNA duplex with perfect A-form  
360 geometry and sequence 5'-GCUUAC-3' / 5'-GTAAGC-3' (created using the program  
361 “fiber” with the -rna option, followed by manual alteration of the DNA strand in PyMOL  
362 v2.4.1). The second component was a 6-base-pair DNA:DNA duplex with perfect B-form  
363 geometry and sequence 5'-GATGCT-3' / 5'-AGCATC-3' (created with “fiber” option -4).  
364 Successful phasing was achieved by searching for three copies of each of these  
365 components (six components total). Additional phosphodiester and nucleotides were  
366 built in Coot v0.9.2 [49], and the model underwent iterative refinements in Phenix.  
367 Phasing and preliminary refinements were initially performed using an earlier (lower-  
368 resolution) dataset that had similar unit cell parameters to the final dataset described  
369 above.

370         The initial model, which was refined into a map generated from the earlier  
371 dataset, was rigid-body docked into the final-dataset-derived map and underwent further  
372 iterative refinements, beginning with resetting of the atomic B-factors, simulated  
373 annealing, and addition of ordered solvent. Non-crystallographic symmetry restraints  
374 were applied in early rounds of refinement to link the torsion angles of the three  
375 molecules within the asymmetric unit; these restraints were removed in the final rounds  
376 of refinement. TLSMD [50,51] was used to determine optimal segmentation for  
377 Translation/Libration/Screw (TLS) refinement (each 7-mer comprised a separate  
378 segment, and the 12-mers were each divided into three segments: nucleotides 1-4, 5-8,  
379 9-12). Refinement using Phenix’s default geometry library yielded dozens of bond  
380 lengths and angles that were marked as outliers by the PDB validation server, so the  
381 faulty parameters were rigidified *ad hoc* (that is, their estimated standard deviation

382 values in the library files were made smaller, with no change to the mean values). The  
383 final three cycles of refinement were performed in Phenix with adjustments to XYZ  
384 (reciprocal-space), TLS (segments as indicated above), and individual B-factors. In  
385 Table 1, STARANISO and Phenix were used to calculate the data collection statistics  
386 and the refinement statistics, respectively.

387         The final  $R_{\text{free}}$  value (0.283) is higher than expected for a structure refined using  
388 diffraction data at a resolution of 1.6 Å [52]. However, it is important to note that the  
389 highest-resolution shell has a completeness of just 6%, and completeness only rises  
390 above 95% at ~2.3 Å, due mostly to the anisotropic nature of the diffraction data.  
391 Additionally, due to diffraction anisotropy, the  $2mF_o-DF_c$  map appears distorted along  
392 certain dimensions, affecting interpretation of Molecule 3 most negatively. Therefore,  
393 the geometric details of Molecule 3's phosphate backbone are poorly constrained, and  
394 Molecule 1 or 2 should instead be considered as the most accurate representation of  
395 the structure. Anisotropy also prevented identification of water molecules around  
396 Molecule 3. Furthermore, the  $mF_o-DF_c$  map revealed several globular patches of  
397 positive density in the major and minor grooves of all molecules, 3.5-4 Å away from the  
398 nearest nucleic acid atom. Because these patches bore no recognizable geometric  
399 features, attempts to model them with buffer components failed to improve  $R_{\text{free}}$ , so they  
400 were left unmodeled. Any of the mentioned issues may contribute to the high  $R_{\text{free}}$   
401 value.

402         Beyond the anisotropy, the overall high B-factors in this structure produce  $2mF_o-$   
403  $DF_c$  density that is “blurred” [53]. To enhance high-resolution features of the map for  
404 visual inspection and figure preparation, Coot's Map Sharpening tool was used. B-factor

405 adjustments used for sharpening are reported in the figure legend. Sharpening only  
406 effectively revealed high-resolution features for Molecule 1 or 2, as density from  
407 Molecule 3 is too anisotropically distorted.

408

## 409 **Structure analysis and figure preparation**

410 Structural model and map figures were prepared in PyMOL. Alignments were performed  
411 using PyMOL's "align" function without outlier rejection. Regularized A-form and B-form  
412 DNA:DNA duplexes were prepared using X3DNA's "fiber" program (options -1 and -4,  
413 respectively), using the same sequence present in the helical portion of the  
414 crystallization construct (except RNA was modeled as the corresponding DNA  
415 sequence). While the A-form DNA:DNA helix may not perfectly represent a regularized  
416 version of the RNA:DNA helix with our sequence [19,20], "fiber" does not permit  
417 generation of RNA:DNA helices with generic sequence, and the general geometric  
418 features of A-form DNA:DNA vs. A-form RNA:DNA are expected to be similar enough to  
419 support the conclusions drawn in this work. Base step and nucleotide geometric  
420 parameters were calculated using the "find\_pair" and "analyze" programs within X3DNA.  
421 On graphs of these parameters, dashed lines indicating the expected value for A-form  
422 or B-form DNA were calculated by performing an equivalent analysis on the X3DNA-  
423 generated regularized A-form/B-form helices and taking the average across all base  
424 steps/nucleotides, unless indicated otherwise. Nucleotides with A/B character exhibit a  
425 spread of values around those indicated by the dashed lines (as represented more  
426 accurately by the dashed ellipses in Fig 4B), and the dashed lines are drawn merely to  
427 guide the reader's eye to general trends. Angles between the helical axes of the

428 DNA:DNA and RNA:DNA duplex were calculated as the angle between the helical axis  
429 vectors of the aligned regularized A-form and B-form helices. Graphs were prepared  
430 using matplotlib v3.3.2 [54]. Final figures were prepared in Adobe Illustrator v25.4.1.

431

## 432 **Acknowledgements**

433 We thank J.M. Holton and J.H. Cate for data processing advice. We thank G. Meigs for  
434 technical assistance at the beamline. We thank J. Kuriyan for scientific advice.

435

## 436 **References**

- 437 1. Broadwater DWB, Cook AW, Kim HD. First passage time study of DNA strand  
438 displacement. *Biophys J.* 2021;120: 2400–2412. doi:10.1016/j.bpj.2021.01.043
- 439 2. Hays FA, Watson J, Ho PS. Caution! DNA crossing: crystal structures of Holliday  
440 junctions. *J Biol Chem.* 2003;278: 49663–49666. doi:10.1074/jbc.R300033200
- 441 3. Kowalczykowski SC. Biochemistry of genetic recombination: energetics and  
442 mechanism of DNA strand exchange. *Annu Rev Biophys Biophys Chem.* 1991;20:  
443 539–575. doi:10.1146/annurev.bb.20.060191.002543
- 444 4. McKinney SA, Déclais A-C, Lilley DMJ, Ha T. Structural dynamics of individual  
445 Holliday junctions. *Nat Struct Biol.* 2003;10: 93–97. doi:10.1038/nsb883
- 446 5. Ortiz-Lombardía M, González A, Eritja R, Aymamí J, Azorín F, Coll M. Crystal  
447 structure of a DNA Holliday junction. *Nat Struct Biol.* 1999;6: 913–917.  
448 doi:10.1038/13277

- 449 6. Seeman NC, Kallenbach NR. DNA branched junctions. *Annu Rev Biophys Biomol*  
450 *Struct.* 1994;23: 53–86. doi:10.1146/annurev.bb.23.060194.000413
- 451 7. Simmel FC, Yurke B, Singh HR. Principles and Applications of Nucleic Acid Strand  
452 Displacement Reactions. *Chem Rev.* 2019;119: 6326–6369.  
453 doi:10.1021/acs.chemrev.8b00580
- 454 8. Srinivas N, Ouldrige TE, Sulc P, Schaeffer JM, Yurke B, Louis AA, et al. On the  
455 biophysics and kinetics of toehold-mediated DNA strand displacement. *Nucleic*  
456 *Acids Res.* 2013;41: 10641–10658. doi:10.1093/nar/gkt801
- 457 9. Crossley MP, Bocek M, Cimprich KA. R-Loops as Cellular Regulators and Genomic  
458 Threats. *Mol Cell.* 2019;73: 398–411. doi:10.1016/j.molcel.2019.01.024
- 459 10. Altae-Tran H, Kannan S, Demircioglu FE, Oshiro R, Nety SP, McKay LJ, et al. The  
460 widespread IS200/IS605 transposon family encodes diverse programmable RNA-  
461 guided endonucleases. *Science.* 2021;374: 57–65. doi:10.1126/science.abj6856
- 462 11. Karvelis T, Druteika G, Bigelyte G, Budre K, Zedaveinyte R, Silanskas A, et al.  
463 Transposon-associated TnpB is a programmable RNA-guided DNA endonuclease.  
464 *Nature.* 2021;599: 692–696. doi:10.1038/s41586-021-04058-1
- 465 12. Chen JS, Doudna JA. The chemistry of Cas9 and its CRISPR colleagues. *Nat Rev*  
466 *Chem.* 2017;1: 1–15. doi:10.1038/s41570-017-0078
- 467 13. Knott GJ, Doudna JA. CRISPR-Cas guides the future of genetic engineering.  
468 *Science.* 2018;361: 866–869. doi:10.1126/science.aat5011

- 469 14. Pickar-Oliver A, Gersbach CA. The next generation of CRISPR-Cas technologies  
470 and applications. *Nat Rev Mol Cell Biol.* 2019;20: 490–507. doi:10.1038/s41580-  
471 019-0131-5
- 472 15. Sternberg SH, Redding S, Jinek M, Greene EC, Doudna JA. DNA interrogation by  
473 the CRISPR RNA-guided endonuclease Cas9. *Nature.* 2014;507: 62–67.  
474 doi:10.1038/nature13011
- 475 16. Cofsky JC, Karandur D, Huang CJ, Witte IP, Kuriyan J, Doudna JA. CRISPR-  
476 Cas12a exploits R-loop asymmetry to form double-strand breaks. Wolberger C,  
477 Bailey S, Ke A, White MF, editors. *eLife.* 2020;9: e55143. doi:10.7554/eLife.55143
- 478 17. Aymami J, Coll M, Marel GA van der, Boom JH van, Wang AH, Rich A. Molecular  
479 structure of nicked DNA: a substrate for DNA repair enzymes. *PNAS.* 1990;87:  
480 2526–2530.
- 481 18. Roll C, Ketterlé C, Faibis V, Fazakerley GV, Boulard Y. Conformations of nicked  
482 and gapped DNA structures by NMR and molecular dynamic simulations in water.  
483 *Biochemistry.* 1998;37: 4059–4070. doi:10.1021/bi972377w
- 484 19. Fedoroff OYu null, Salazar M, Reid BR. Structure of a DNA:RNA hybrid duplex.  
485 Why RNase H does not cleave pure RNA. *J Mol Biol.* 1993;233: 509–523.  
486 doi:10.1006/jmbi.1993.1528
- 487 20. Horton NC, Finzel BC. The Structure of an RNA/DNA Hybrid: A Substrate of the  
488 Ribonuclease Activity of HIV-1 Reverse Transcriptase. *Journal of Molecular*  
489 *Biology.* 1996;264: 521–533. doi:10.1006/jmbi.1996.0658



- 490 21. Milman G, Langridge R, Chamberlin MJ. The structure of a DNA-RNA hybrid. Proc  
491 Natl Acad Sci U S A. 1967;57: 1804–1810.
- 492 22. Zhu L, Salazar M, Reid BR. DNA duplexes flanked by hybrid duplexes: the solution  
493 structure of chimeric junctions in [r(cgcg)d(TATACGCG)]<sub>2</sub>. Biochemistry. 1995;34:  
494 2372–2380. doi:10.1021/bi00007a033
- 495 23. Dickerson RE, Goodsell DS, Neidle S. ...the tyranny of the lattice... Proc Natl Acad  
496 Sci U S A. 1994;91: 3579–3583. doi:10.1073/pnas.91.9.3579
- 497 24. Drew HR, Wing RM, Takano T, Broka C, Tanaka S, Itakura K, et al. Structure of a  
498 B-DNA dodecamer: conformation and dynamics. Proc Natl Acad Sci U S A.  
499 1981;78: 2179–2183. doi:10.1073/pnas.78.4.2179
- 500 25. Saenger W. Principles of Nucleic Acid Structure. Springer Science & Business  
501 Media; 1984.
- 502 26. El Hassan MA, Calladine CR. Conformational characteristics of DNA: empirical  
503 classifications and a hypothesis for the conformational behaviour of dinucleotide  
504 steps. Philosophical Transactions of the Royal Society of London Series A:  
505 Mathematical, Physical and Engineering Sciences. 1997;355: 43–100.  
506 doi:10.1098/rsta.1997.0002
- 507 27. Lu XJ, Shakked Z, Olson WK. A-form conformational motifs in ligand-bound DNA  
508 structures. J Mol Biol. 2000;300: 819–840. doi:10.1006/jmbi.2000.3690

- 509 28. Ban C, Ramakrishnan B, Sundaralingam M. A single 2'-hydroxyl group converts B-  
510 DNA to A-DNA. Crystal structure of the DNA-RNA chimeric decamer duplex  
511 d(CCGGC)r(G)d(CCGG) with a novel intermolecular G-C base-paired quadruplet. J  
512 Mol Biol. 1994;236: 275–285. doi:10.1006/jmbi.1994.1134
- 513 29. Egli M, Usman N, Zhang SG, Rich A. Crystal structure of an Okazaki fragment at 2-  
514 A resolution. Proc Natl Acad Sci U S A. 1992;89: 534–538.  
515 doi:10.1073/pnas.89.2.534
- 516 30. Egli M, Usman N, Rich A. Conformational influence of the ribose 2'-hydroxyl group:  
517 crystal structures of DNA-RNA chimeric duplexes. Biochemistry. 1993;32: 3221–  
518 3237.
- 519 31. Wahl MC, Sundaralingam M. B-form to A-form conversion by a 3'-terminal ribose:  
520 crystal structure of the chimera d(CCACTAGTG)r(G). Nucleic Acids Res. 2000;28:  
521 4356–4363. doi:10.1093/nar/28.21.4356
- 522 32. Wang AH, Fujii S, van Boom JH, van der Marel GA, van Boeckel SA, Rich A.  
523 Molecular structure of r(GCG)d(TATACGC): a DNA--RNA hybrid helix joined to  
524 double helical DNA. Nature. 1982;299: 601–604. doi:10.1038/299601a0
- 525 33. Mellema JR, Haasnoot CA, van der Marel GA, Wille G, van Boeckel CA, van Boom  
526 JH, et al. Proton NMR studies on the covalently linked RNA-DNA hybrid  
527 r(GCG)d(TATACGC). Assignment of proton resonances by application of the  
528 nuclear Overhauser effect. Nucleic Acids Res. 1983;11: 5717–5738.  
529 doi:10.1093/nar/11.16.5717

- 530 34. Salazar M, Fedoroff OYu null, Zhu L, Reid BR. The solution structure of the  
531 r(gcg)d(TATACCC):d(GGGTATACGC) Okazaki fragment contains two distinct  
532 duplex morphologies connected by a junction. *J Mol Biol.* 1994;241: 440–455.  
533 doi:10.1006/jmbi.1994.1519
- 534 35. Salazar M, Fedoroff OY, Reid BR. Structure of chimeric duplex junctions: solution  
535 conformation of the retroviral Okazaki-like fragment  
536 r(ccca)d(AATGA).d(TCATTTGGG) from Moloney murine leukemia virus.  
537 *Biochemistry.* 1996;35: 8126–8135. doi:10.1021/bi9528917
- 538 36. Selsing E, Wells RD, Early TA, Kearns DR. Two contiguous conformations in a  
539 nucleic acid duplex. *Nature.* 1978;275: 249–250. doi:10.1038/275249a0
- 540 37. Häse F, Zacharias M. Free energy analysis and mechanism of base pair stacking  
541 in nicked DNA. *Nucleic Acids Res.* 2016;44: 7100–7108. doi:10.1093/nar/gkw607
- 542 38. Pacesa M, Jinek M. Mechanism of R-loop formation and conformational activation  
543 of Cas9. 2021. p. 2021.09.16.460614. Available:  
544 <https://www.biorxiv.org/content/10.1101/2021.09.16.460614v1>
- 545 39. Zhu X, Clarke R, Puppala AK, Chittori S, Merk A, Merrill BJ, et al. Cryo-EM  
546 structures reveal coordinated domain motions that govern DNA cleavage by Cas9.  
547 *Nat Struct Mol Biol.* 2019;26: 679–685. doi:10.1038/s41594-019-0258-2
- 548 40. Cofsky JC, Soczek KM, Knott GJ, Nogales E, Doudna JA. CRISPR-Cas9 bends  
549 and twists DNA to read its sequence. *Biochemistry*; 2021 Sep.  
550 doi:10.1101/2021.09.06.459219

- 551 41. Lapinaite A, Knott GJ, Palumbo CM, Lin-Shiao E, Richter MF, Zhao KT, et al. DNA  
552 capture by a CRISPR-Cas9-guided adenine base editor. *Science*. 2020;369: 566–  
553 571. doi:10.1126/science.abb1390
- 554 42. Cavaluzzi MJ, Borer PN. Revised UV extinction coefficients for nucleoside-5'-  
555 monophosphates and unpaired DNA and RNA. *Nucleic Acids Res*. 2004;32: e13.  
556 doi:10.1093/nar/gnh015
- 557 43. Kabsch W. XDS. *Acta Cryst D*. 2010;66: 125–132.  
558 doi:10.1107/S0907444909047337
- 559 44. Kabsch W. Integration, scaling, space-group assignment and post-refinement. *Acta*  
560 *Cryst D*. 2010;66: 133–144. doi:10.1107/S0907444909047374
- 561 45. Tickle IJ, Flensburg C, Keller P, Paciorek W, Sharff A, Vonrhein C, et al.  
562 STARANISO. Cambridge, United Kingdom: Global Phasing Ltd.; 2018. Available:  
563 <http://staraniso.globalphasing.org/cgi-bin/staraniso.cgi>
- 564 46. McCoy AJ, Grosse-Kunstleve RW, Adams PD, Winn MD, Storoni LC, Read RJ.  
565 Phaser crystallographic software. *J Appl Cryst*. 2007;40: 658–674.  
566 doi:10.1107/S0021889807021206
- 567 47. Liebschner D, Afonine PV, Baker ML, Bunkóczi G, Chen VB, Croll TI, et al.  
568 Macromolecular structure determination using X-rays, neutrons and electrons:  
569 recent developments in Phenix. *Acta Cryst D*. 2019;75: 861–877.  
570 doi:10.1107/S2059798319011471

- 571 48. Lu X-J, Olson WK. 3DNA: a software package for the analysis, rebuilding and  
572 visualization of three-dimensional nucleic acid structures. *Nucleic Acids Res.*  
573 2003;31: 5108–5121. doi:10.1093/nar/gkg680
- 574 49. Emsley P, Lohkamp B, Scott WG, Cowtan K. Features and development of Coot.  
575 *Acta Crystallogr D Biol Crystallogr.* 2010;66: 486–501.  
576 doi:10.1107/S0907444910007493
- 577 50. Painter J, Merritt EA. TLSMD web server for the generation of multi-group TLS  
578 models. *J Appl Cryst.* 2006;39: 109–111. doi:10.1107/S0021889805038987
- 579 51. Painter J, Merritt EA. Optimal description of a protein structure in terms of multiple  
580 groups undergoing TLS motion. *Acta Cryst D.* 2006;62: 439–450.  
581 doi:10.1107/S0907444906005270
- 582 52. Kleywegt GJ, Brünger AT. Checking your imagination: applications of the free R  
583 value. *Structure.* 1996;4: 897–904. doi:10.1016/s0969-2126(96)00097-4
- 584 53. Liu C, Xiong Y. Electron density sharpening as a general technique in  
585 crystallographic studies. *J Mol Biol.* 2014;426: 980–993.  
586 doi:10.1016/j.jmb.2013.11.014
- 587 54. Hunter JD. Matplotlib: A 2D Graphics Environment. *Computing in Science*  
588 *Engineering.* 2007;9: 90–95. doi:10.1109/MCSE.2007.55

589

## 590 **Supporting information**

591 **S1 Fig. Additional geometric details of the A-to-B transition.**

592 (A) X-displacement of the 11 base steps of the 12-bp helix. Black, DNA; red, RNA. (B)  
593 Inclination of the 11 base steps of the 12-bp helix. (C) Slide of the 11 base steps of the  
594 12-bp helix. (D) Pseudorotation phase angles for the ribose/deoxyribose conformation  
595 at every nucleotide within the 12-bp helix (24 data points per molecule). The modeled  
596 sugar conformations might not be unique solutions for this dataset, as in many cases  
597 these structural details cannot be directly discerned from the  $2mF_o-DF_c$  map. For this  
598 dataset, the most reliable parameters are those defined directly by the nucleobase and  
599 phosphate positions, which appear clearly in the  $2mF_o-DF_c$  map (and likely impose  
600 indirect geometric constraints on the sugar pucker).

601 S2 Fig.

602

603 **S2 Fig. Nucleotide torsion angles for Molecules 2 and 3.**

604 Analogous to Fig 4B.

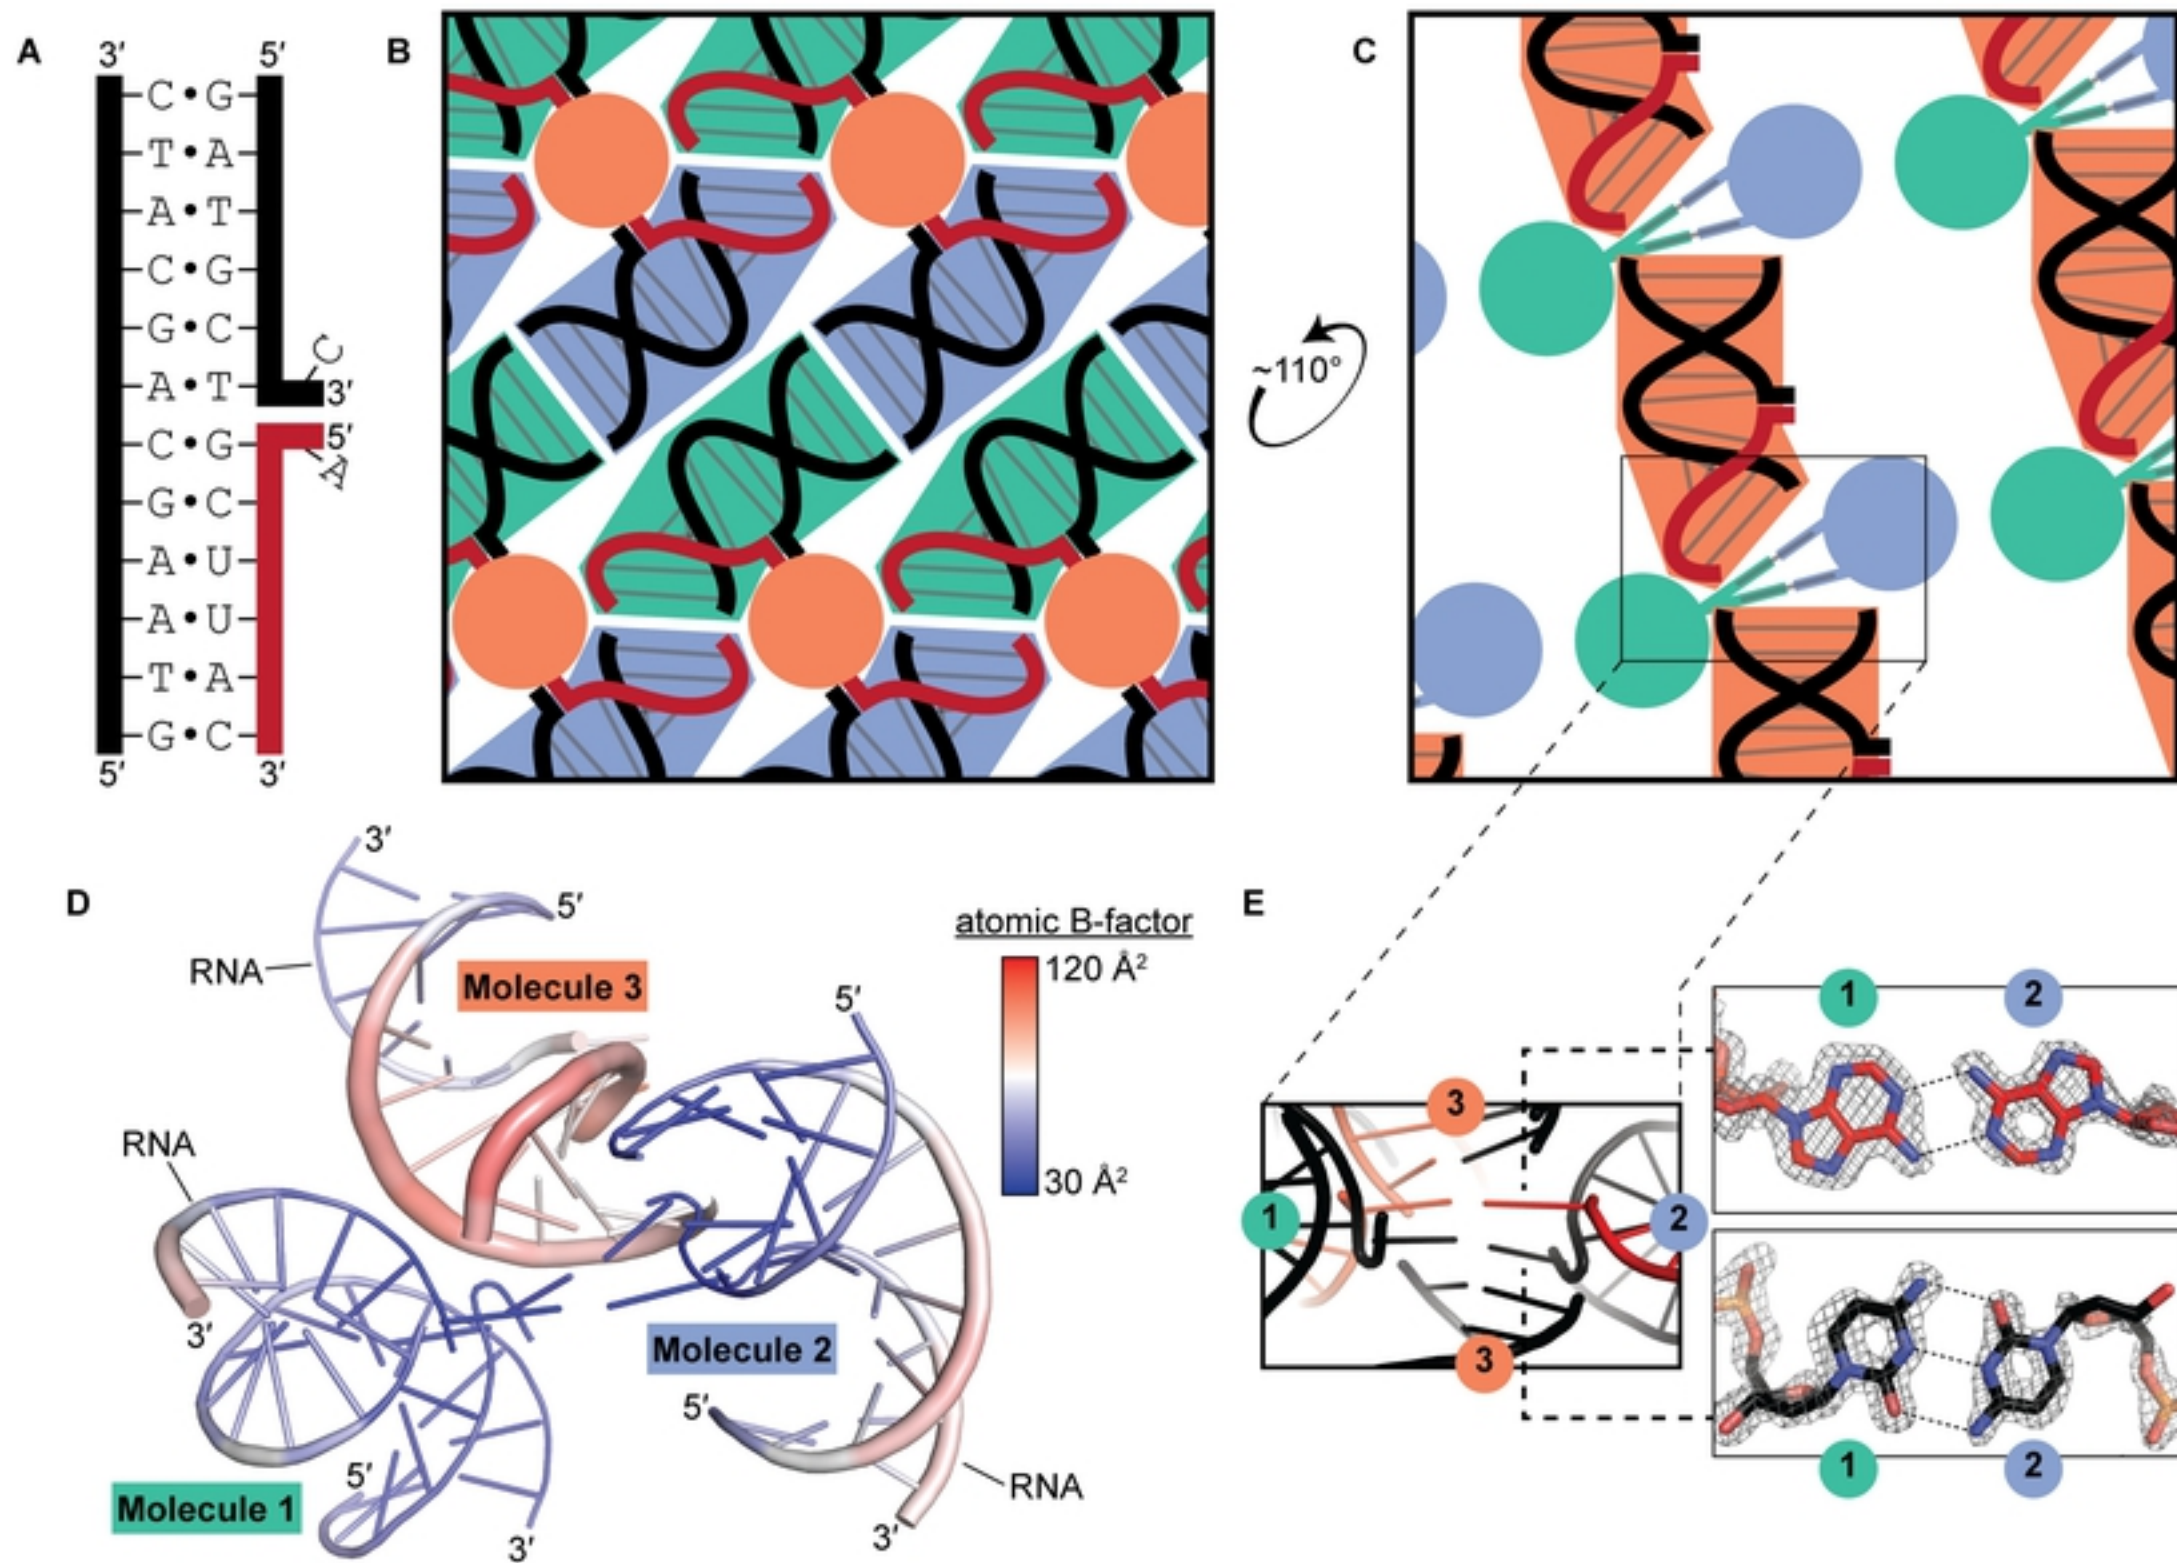

Fig 1

**A**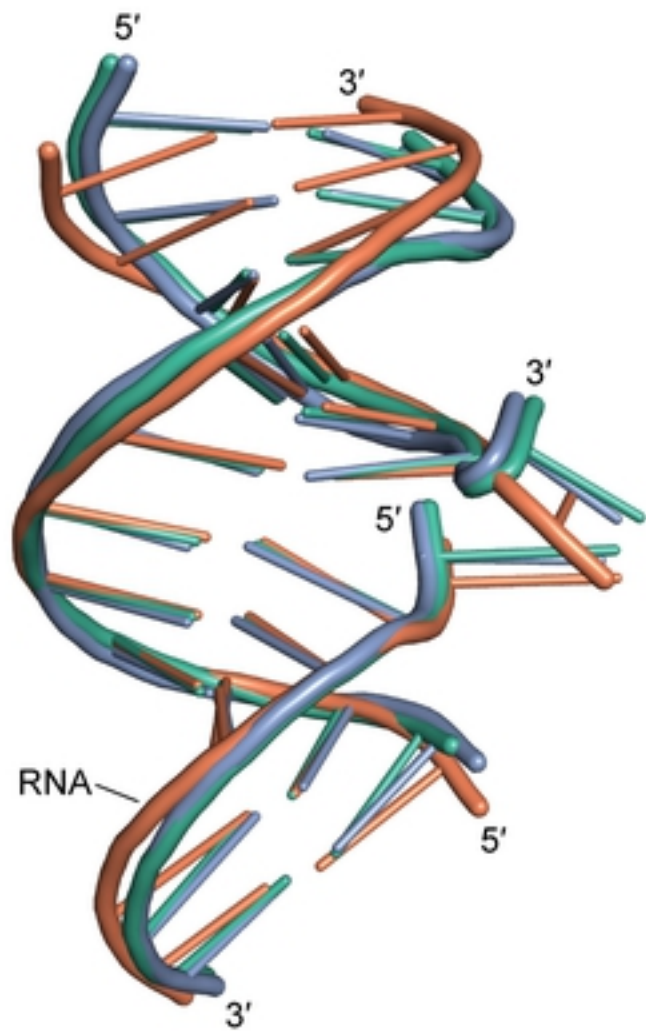**B**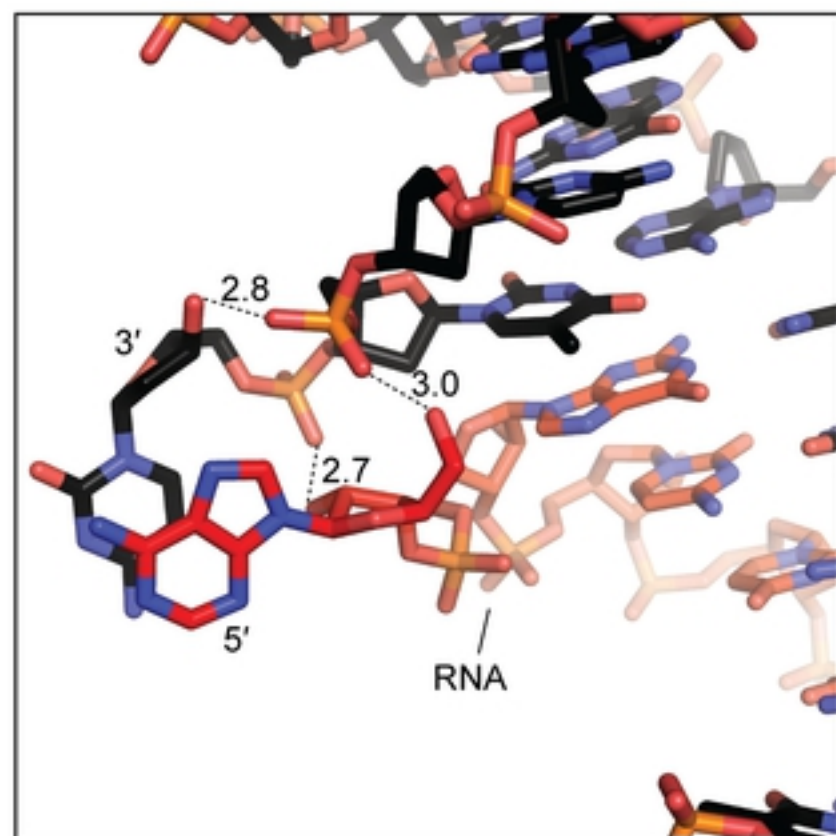**Fig 2**



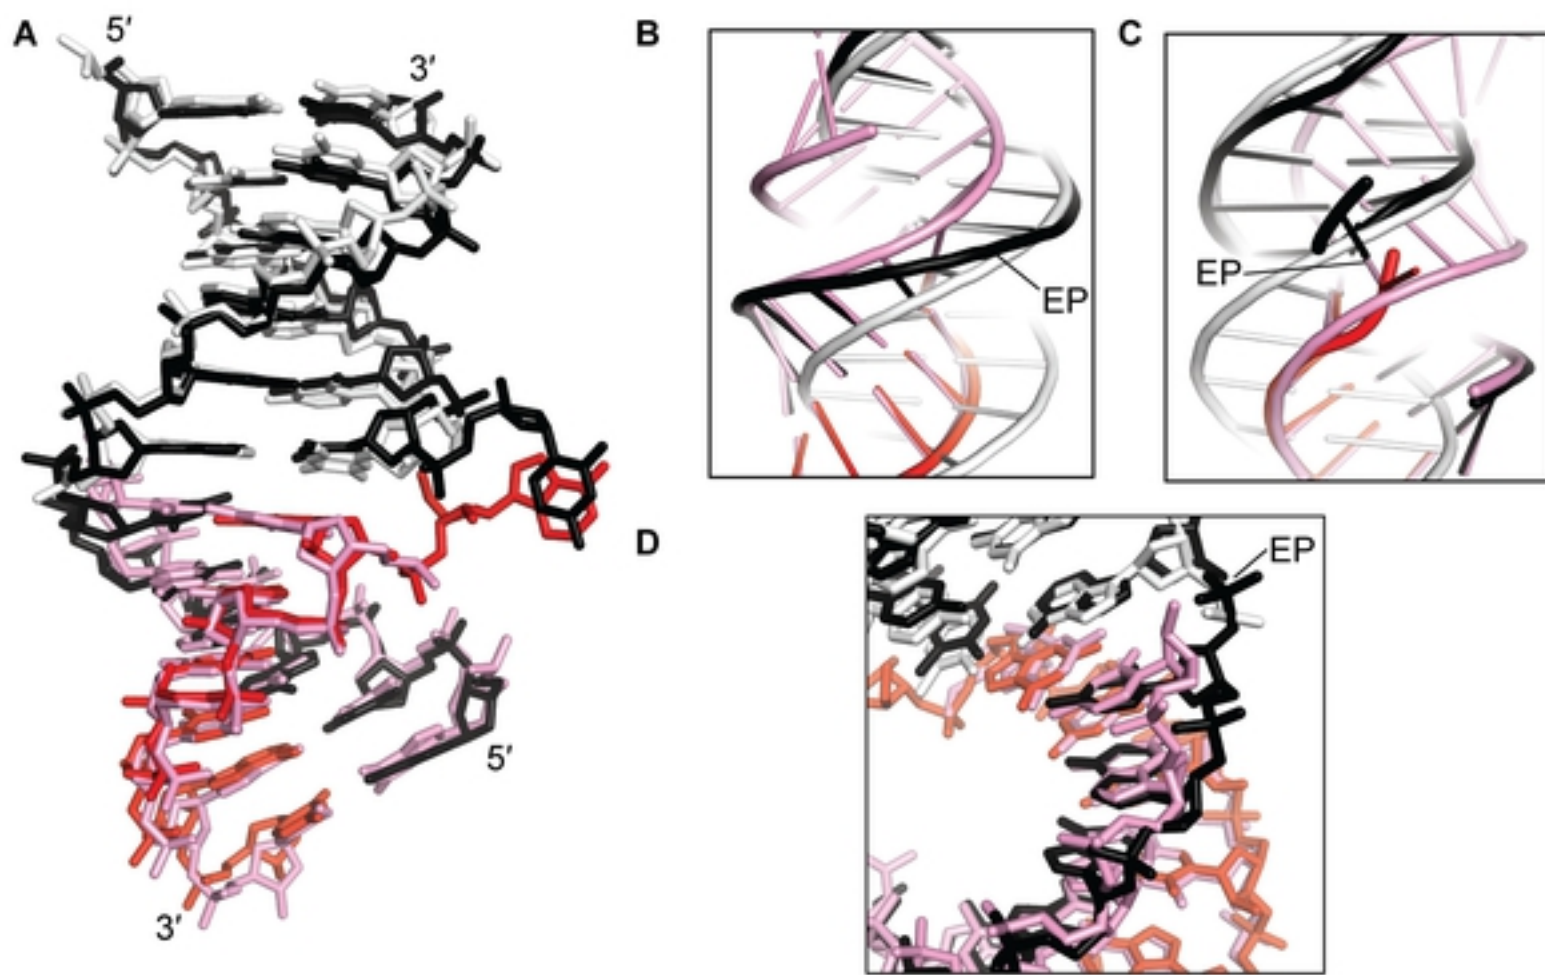

Fig 3

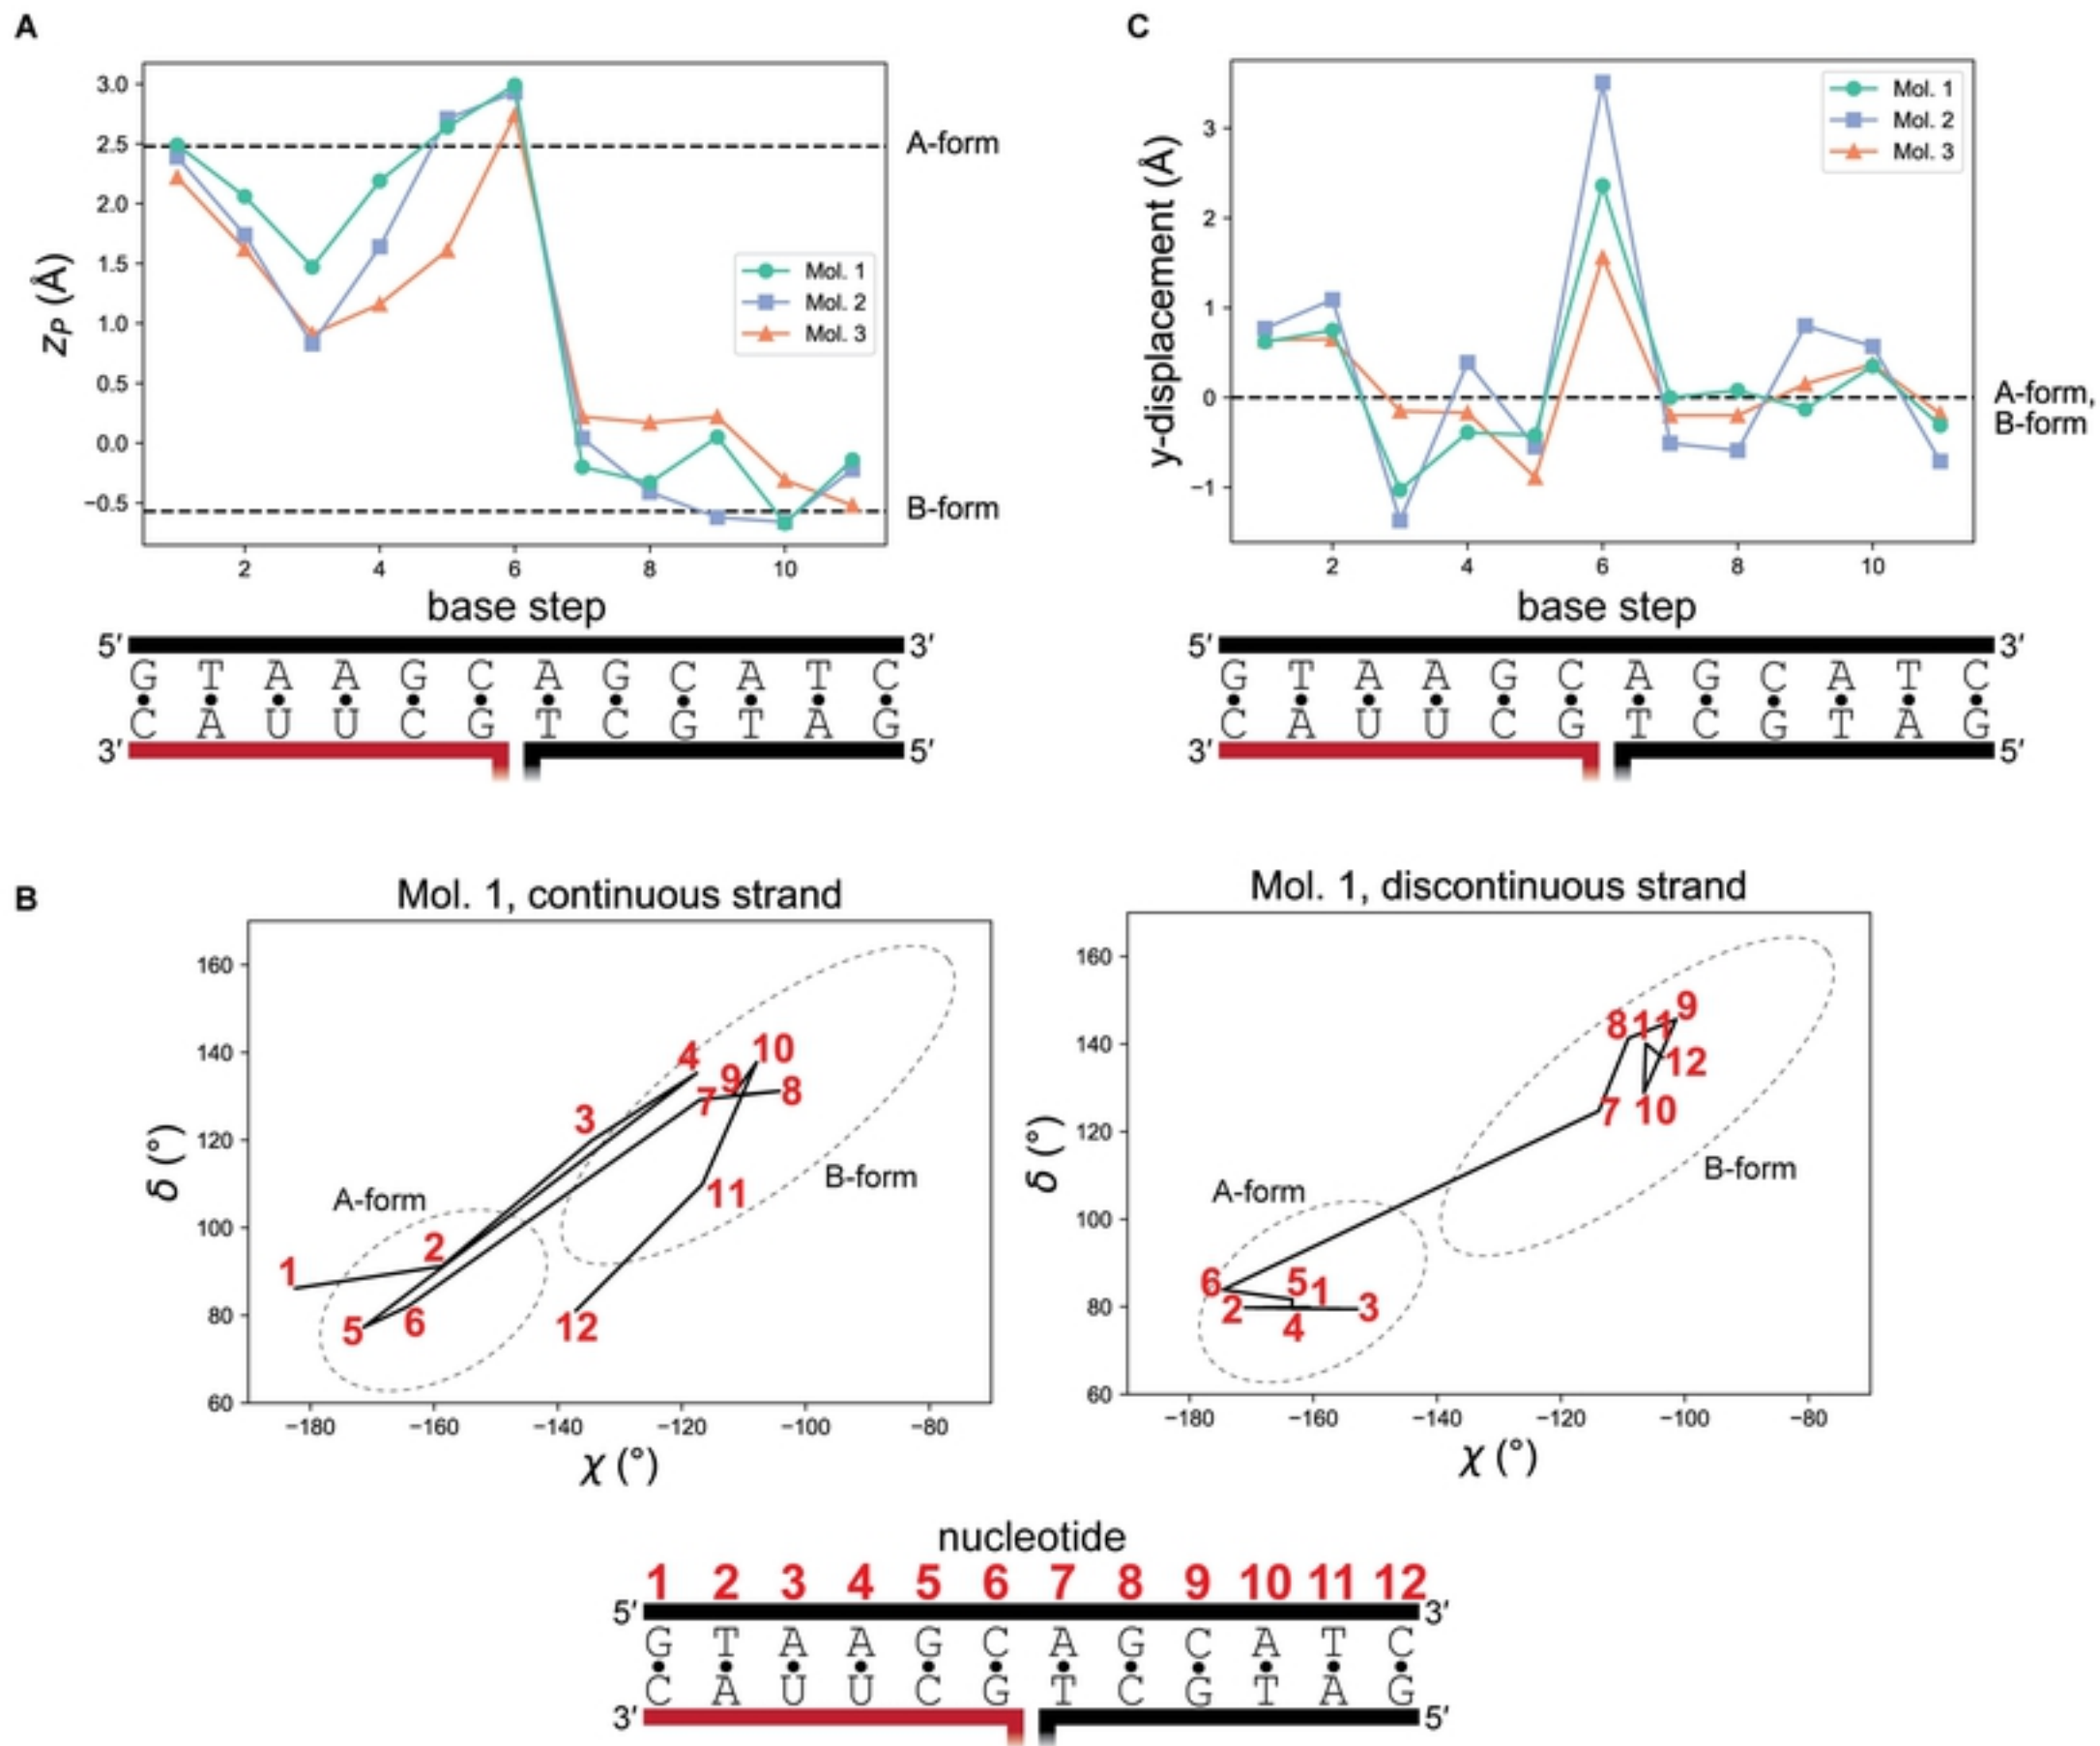

Fig 4

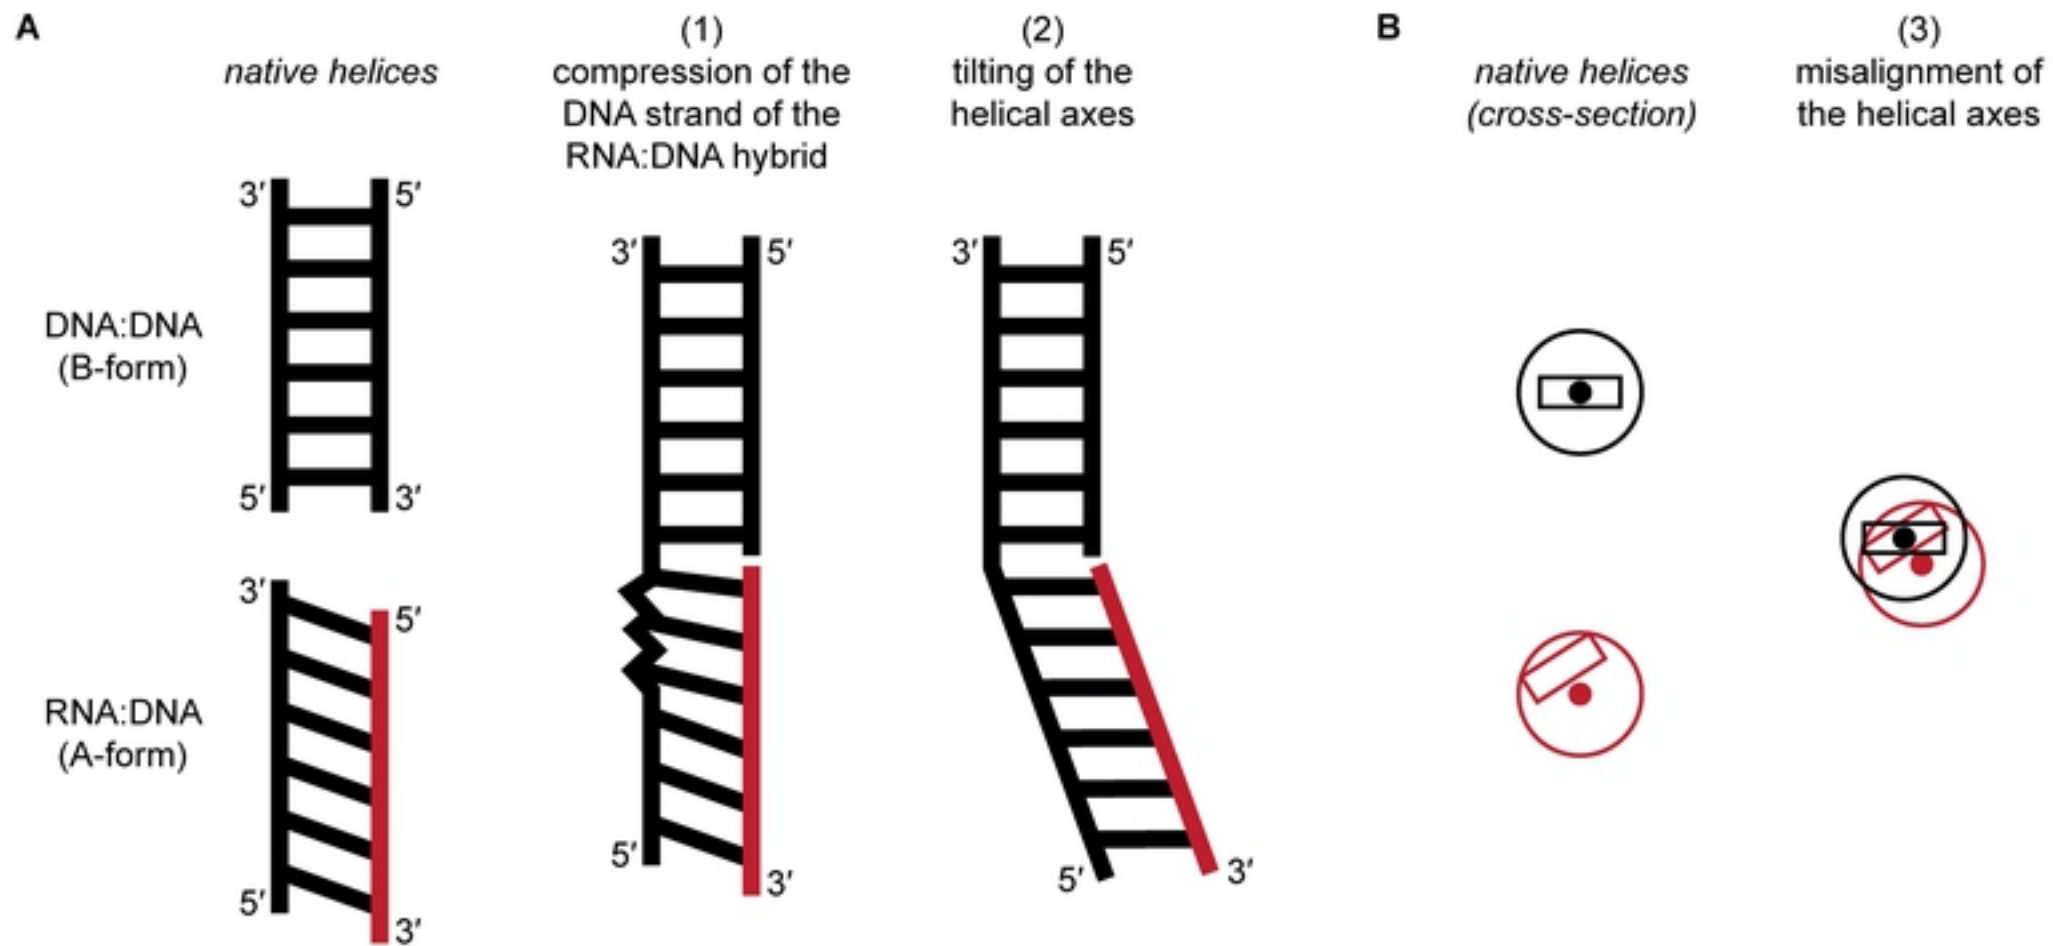

Fig 5
